1 **Asc-Seurat – Analytical single-cell Seurat-based web**  
2 **application**

3

4 Pereira WJ<sup>1</sup>, Almeida FM<sup>2</sup>, Balmant KM<sup>1</sup>, Rodriguez DC<sup>1</sup>, Triozzi PM<sup>1</sup>, Schmidt HW<sup>1</sup>,  
5 Dervinis C<sup>1</sup>, Pappas Jr GJ<sup>2</sup>, Kirst M<sup>1,3\*</sup>

6 <sup>1</sup> School of Forest, Fisheries, and Geomatics Sciences, University of Florida,  
7 Gainesville, FL 32611, USA.

8 <sup>2</sup> Department of Cell Biology, Institute of Biological Sciences, University of Brasília,  
9 Brasília, DF 70910-900, Brazil.

10 <sup>3</sup> Genetics Institute, University of Florida, Gainesville, FL 32611, USA.

11

12 \*To whom correspondence should be addressed.

13

14

## 15 **Abstract**

16 **Summary:** Single-cell RNA sequencing (scRNA-seq) has become a popular approach  
17 for studying the transcriptome, providing a powerful tool for discovering and  
18 characterizing cell types and their developmental trajectories. However, scRNA-seq  
19 analysis is complex, requiring a continuous, iterative process to refine the data  
20 processing and uncover relevant biological information. We present Asc-Seurat, a  
21 feature rich workbench, providing a user-friendly and easy-to-install web application  
22 encapsulating the necessary tools for an all-encompassing and fluid scRNA-seq data  
23 analysis.

24 **Availability and implementation:** Asc-Seurat is available at  
25 [https://github.com/KirstLab/asc\\_seurat/](https://github.com/KirstLab/asc_seurat/) and released under GNU 3 license.

26 **Contact:** mkirst@ufl.edu

27 **Supplementary information:** Supplementary data are available at *Bioinformatics*  
28 online.

## 29 **1. Introduction**

30

31 Single-cell technologies dramatically enhanced our capacity to characterize  
32 tissues and their cell types. By quantifying individual cells' gene expression, single-  
33 cell RNA sequencing (scRNA-seq) substantially increases the resolution of  
34 transcriptome profiles from whole tissues or organs by disentangling gene  
35 expression signals from bulk cell populations down to cell specific contribution (Stark  
36 et al. 2019).

37 Several software has been developed to address the different aspects of  
38 scRNA-seq data analysis. Seurat (Stuart *et al.*, 2019) is an R package widely used  
39 for scRNA-seq data processing, cell clustering and analysis of differentially

40 expressed genes (DEGs) of single or multiple samples. Further analyses, like single-  
41 cell lineage development trajectory inference tools are provided by software such as  
42 dynverse (Saelens et al., 2019), in which multiple models can be evaluated and  
43 DEGs identified in these trajectories.

44 The Seurat's and dynverse's functions are simple to use, and the results  
45 reported are intuitive to interpret. Nevertheless, the dependency on a command-line  
46 interface and the need for knowledge of the R programming language poses a major  
47 barrier for researchers with limited computational expertise. Moreover, each  
48 analytical step outcome is strongly influenced by data quality and execution  
49 parameters, requiring the continuous manipulation of these parameters and  
50 reevaluation of subsets of data. Tools that simplify this iterative process and  
51 integration across analysis platforms are essential for biologists.

52 Here we present Asc-Seurat (Analytical single-cell Seurat-based web  
53 application), an easy to install interactive web application implemented using Shiny  
54 (<https://shiny.rstudio.com/>). Asc-Seurat provides a comprehensive scRNA-seq  
55 analysis workbench (Figure 1-A), with the integration of many algorithmic capabilities  
56 from Seurat and dynverse, combined with gene functional annotation using BioMart  
57 (Smedley *et al.*, 2009) via the biomaRt package (Durinck *et al.*, 2009).

58

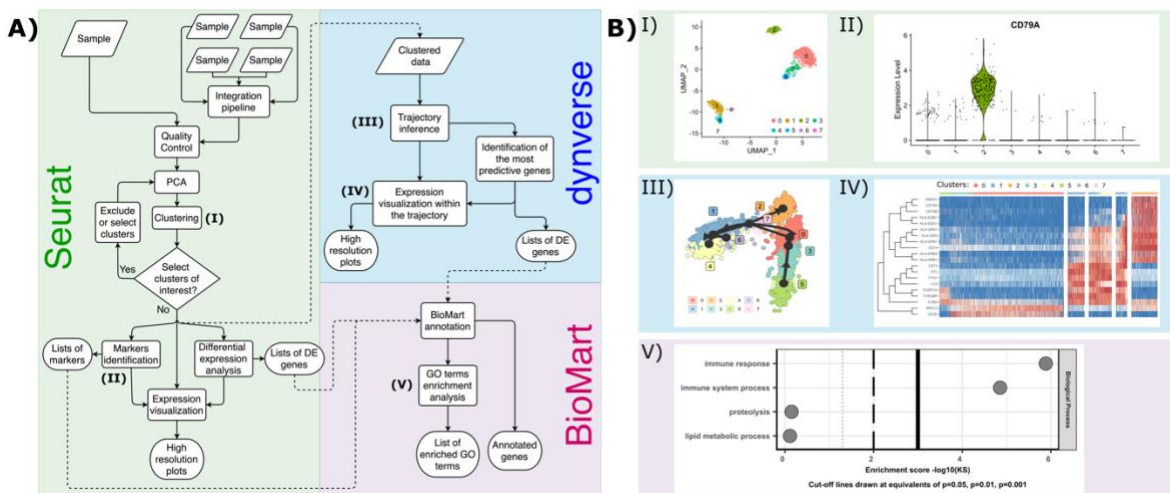

59

60 **Figure 1. Asc-Seurat workflow overview (A) and demonstrative results using the 10x's**

61 **PBMC dataset (B).** Asc-Seurat is built on three analytical cores (A). Using Seurat, users

62 explore scRNA-seq data to identify cell types, markers, and DEGs. Dynverse allows the

63 evaluation and visualization of developmental trajectories and identifies DEGs on these

64 trajectories. Asc-Seurat also implements BioMart for functional annotation and GO terms

65 enrichment analysis. B-I) UMAP plot demonstrating the cluster of cells detected in the PBMC

66 sample. B-II) Visualization of the expression of a gene (CD79A) identified as a marker for

67 cluster 2. B-III) Visualization of the developmental trajectory inferred using slingshot (Street

68 *et al.*, 2018), a model in dynverse. B-IV) Heatmap showing the gene expression of 20 DEGs,

69 ranked by their importance in predicting the trajectory. B-V) Enriched GO terms, in the

70 category biological process, in the set of 50 most important DEGs within the trajectory

71 shown in B-III.

## 72 **2. Asc-Seurat functionalities**

73

74 By employing Asc-Seurat, users have access to 1) a rich and responsive

75 graphical user interface, enabling iterative analysis parametrization; 2) a container-

76 based (Docker, <https://www.docker.com/>) distribution that handles all software

77 dependencies and simplifies installation; 3) integration of multiple samples; 4)

78 selection of cell clusters of interest for reanalysis; 5) search of gene markers and  
79 DEG; 6) incorporation of dozens of models for cell trajectory inference; 7)  
80 identification of DEGs within trajectories; 8) functional annotation of genes; 9) search  
81 for enriched GO terms; and 10) a broad set of publication-ready graphs, among  
82 other features.

### 83 **3. Asc-Seurat use case**

84

85 To demonstrate Asc-Seurat's functionalities, we analyzed the publicly available  
86 10x's Peripheral Blood Mononuclear Cells (PBMC) dataset (**Figure 1-B**). A stepwise  
87 demonstration can be found in the **Supplementary material**.

#### 88 **3.1. Quality control, clustering, and markers identification**

89

90 Asc-Seurat workflow starts with raw scRNA-seq data input and provides several  
91 options to exclude poor quality cells. Violin plots are generated to show the  
92 distribution of cells before and after filtering (**Figure S2**). Expression levels can be  
93 normalized and scaled (Figure S3), followed by clustering and cluster visualization  
94 using UMAP and t-SNE (**Figure 1.B-I and Figure S4**). After clustering, Asc-Seurat  
95 simplifies the selection and reanalysis of subsets of cells from clusters of interest.  
96 Moreover, the expression of genes can be visualized at the individual cell (**Figure**  
97 **S7**) or cluster level (**Figure 1.B-II and Figure S8**). Asc-Seurat also implements  
98 methods to identify cell-type markers and genes differentially expressed among  
99 clusters (**Figure S5**).

100

#### 101 **3.2. Trajectory inference and differential expression**

102

103 Several algorithms are available on Asc-Seurat to model and infer developmental  
104 trajectories among cell clusters (**Figure 1.B-III and Figure S11**), allowing the  
105 visualization of gene expression in individual cells within the trajectory (**Figure S13**)  
106 and the identification of DEGs along the trajectory (**Figure 1.B-IV, Figure S12**).

### 107 **3.3. Functional annotation and enrichment analysis**

108

109 Annotation of genes of interest (e.g., markers, DEGs) can be retrieved by the  
110 Asc-Seurat BioMart module. Moreover, it is possible to search for enriched Gene  
111 Ontology (GO) terms (**Figure 1.B-V and Figure S15**) using topGO (Alexa and  
112 Rahnenfuhrer, 2020; Bioconductor). These capabilities allow the biological  
113 interpretation of scRNA-seq results and real-time hypotheses generation.

## 114 **Acknowledgments**

## 115 **Funding**

116

117 This work was supported by the US Department of Energy, Office of Science  
118 Biological and Environmental Research [DE-SC0018247 to M.K.].

119

120 **Conflict of Interest:** none declared.

## 121 **Data availability**

122

123 The 10x's PBMC dataset is publicly available at

124 [https://cf.10xgenomics.com/samples/cell/pbmc3k/pbmc3k\\_filtered\\_gene\\_bc\\_matrice](https://cf.10xgenomics.com/samples/cell/pbmc3k/pbmc3k_filtered_gene_bc_matrice)

125 s.tar.gz

## 126 **References**

- 127 Alexa A, Rahnenfuhrer J (2020). *topGO: Enrichment Analysis for Gene Ontology*. R package  
128 version 2.42.0.
- 129 Durinck,S. *et al.* (2009) Mapping identifiers for the integration of genomic datasets with the  
130 R/Bioconductor package biomaRt. *Nat. Protoc.*, **4**, 1184–1191.
- 131 Saelens,W. *et al.* (2019) A comparison of single-cell trajectory inference methods. *Nat.*  
132 *Biotechnol.*, **37**, 547–554.
- 133 Smedley,D. *et al.* (2009) BioMart--biological queries made easy. *BMC Genomics*, **10**, 22.
- 134 Street,K. *et al.* (2018) Slingshot: cell lineage and pseudotime inference for single-cell  
135 transcriptomics. *BMC Genomics*, **19**, 477.
- 136 Stark, R. *et al.* (2019) RNA sequencing: the teenage years. *Nat. Rev. Genet.*, **20**, 631-656.
- 137 Stuart,T. *et al.* (2019) Comprehensive Integration of Single-Cell Data. *Cell*, **177**, 1888–  
138 1902.e21.
- 139
